# Supplementary material for: Directing the Viedma ripening of ethylenediammonium sulfate using “Tailor-made” chiral additives
Source: Royal Society of Chemistry journal article supplement (doi:10.1039/c6cc06534a), 2016-01-01
Supplement: c6cc06534a1.pdf [file c6cc06534a1.pdf]

## Directing the Viedma Ripening of Ethylenediammonium Sulfate using “Tailor-made” Chiral Additives

Thi Phuong Thao Nguyen<sup>a</sup>, Pui Shan Monica Cheung<sup>a</sup>, Liora Werber<sup>b</sup>, Jacinthe Gagnon<sup>a</sup>, Reajean Sivakumar<sup>a</sup>, Cameron Lennox<sup>a</sup>, Aaron Sossin<sup>a</sup>, Yitzhak Mastai<sup>\*b</sup> and Louis A. Cuccia<sup>\*a</sup>

<sup>[a]</sup>Department of Chemistry & Biochemistry, Concordia University, 7141 Sherbrooke Street West, Montréal, Québec, H4B 1R6, Canada  
e-mail: Louis.Cuccia@concordia.ca

<sup>[b]</sup>Bar-Ilan University, Department of Chemistry, Ramat Gan, Israel  
e-mail: Yitzhak.Mastai@biu.ac.il

### Supplementary information

The chirality of crystals can be distinguished through circular polarization observed along the optic axis, where the color change on rotating the analyser is opposite for enantiomorphic crystals. In 1861, Gladstone stated:<sup>1</sup>

“ If, in order to make these follow in their natural order—red, orange, yellow, green, blue, violet—it is necessary to turn the analyser to the right—that is to say, in the direction of the hands of a watch—the substance is said to exhibit right-handed or positive circular polarization, which is usually indicated by the sign  or + : if, on the contrary, the analyser must be turned to the left to produce the same result, the polarization is left-handed, or negative, and the sign  or — is employed.”

The most prominent colors observed for ethylenediammonium sulfate (EDS) crystals when observed between crossed polarizers are amber and blue. Accordingly, our group identifies the chirality of EDS by observing a *blue-to-amber-to-clear* or an *amber-to-blue-to-clear* transition on rotating the analyzer clockwise.<sup>2</sup> The correlation of our method with the ‘*natural order*’ of light is illustrated for a *dextrorotatory* and *levorotatory* crystal in Figure ESI-1 a, b, d, & e. Another method to distinguish the chirality of EDS has been described by Matsumoto, Soai and coworkers, where, starting with crossed polarizers, *dextrorotatory* crystals decreased in brightness while *levorotatory* crystals increased in brightness, with clockwise rotation of the analyzer by 45° (Figure ESI-1 c & f).<sup>3</sup>

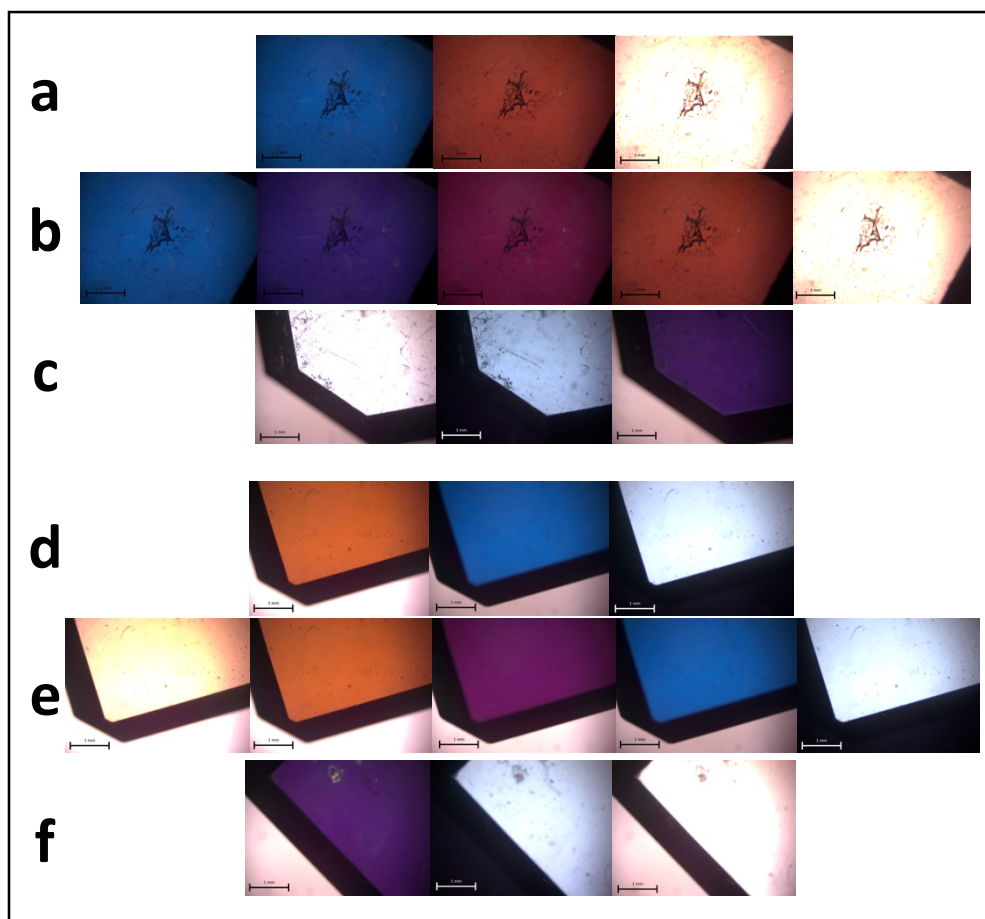

**Figure ESI-1 a, b & c.** Color transitions observed for a *dextrorotatory* crystal of EDS using polarized light microscopy: (a) *blue-to-amber-to-clear* when rotating the analyzer clockwise, (b) *blue-to-violet-to-red-to-orange-to-clear* when rotating the analyzer clockwise and (c) decreasing brightness when rotating the analyzer 45° clockwise (center image: crossed polarizers, left image: 45° counterclockwise and right image: 45° clockwise). **d, e & f:** Color transitions observed for a *levorotatory* crystal of EDS using polarized light microscopy (d) *amber-to-blue-to-clear* when rotating the analyzer clockwise, (e) *yellow-to-orange-to-violet-to-blue-to-clear* when rotating the analyzer clockwise and (f) increasing brightness when rotating the analyzer 45° clockwise (center image: crossed polarizers, left image: 45° counterclockwise and right image: 45° clockwise). (Scale bar = 1 mm)

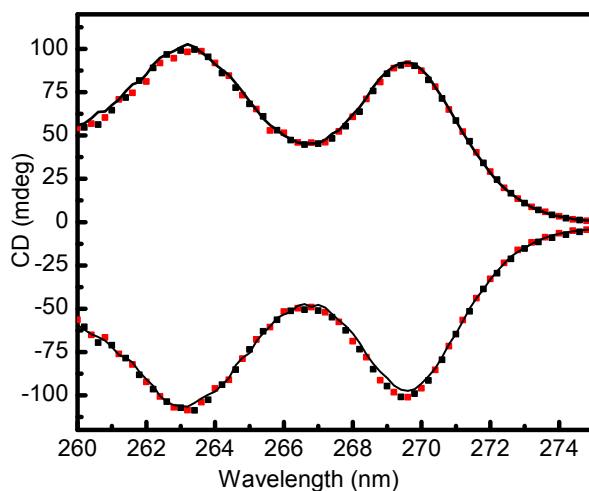

**Figure ESI-2.** CD spectra of *trans*-1,2-diphenylethylenediamine in  $\text{CHCl}_3$  – Upper spectra: (i) (1*R*,2*R*)-1,2-diphenylethylenediamine (3.5 mM) with no EDS (solid line), (ii) (1*R*,2*R*)-1,2-diphenylethylenediamine (3 mL, 3.5 mM) shaken with 300 mg *l*-EDS (106  $\mu\text{m}$  - 150  $\mu\text{m}$ ) for 1 hr. and centrifuged for 20 min. (black squares) and (iii) (1*R*,2*R*)-1,2-diphenylethylenediamine (3 mL, 3.5 mM) shaken with 300 mg *d*-EDS (106  $\mu\text{m}$  - 150  $\mu\text{m}$ ) for 1 hr. and centrifuged for 20 min. (red squares). Lower spectra: (i) (1*S*,2*S*)-1,2-diphenylethylenediamine (3.5 mM) with no EDS (solid line), (ii) (1*S*,2*S*)-1,2-diphenylethylenediamine (3.5 mM) shaken with 300 mg *l*-EDS (106  $\mu\text{m}$  - 150  $\mu\text{m}$ ) for 1 hr. and centrifuged for 20 min. (black squares) and (iii) (1*S*,2*S*)-1,2-diphenylethylenediamine (3 mL, 3.5 mM) shaken with 300 mg *d*-EDS (106  $\mu\text{m}$  - 150  $\mu\text{m}$ ) for 1 hr. and centrifuged for 20 min. (red squares).

## References:

- (1) J. H. Gladstone, *J. Chem. Soc.*, 1861, **13**, 254–270.
- (2) L. A. Cuccia, L. Koby, J. B. Ningappa and M. Dakessian, *J. Chem. Educ.*, 2005, **82**, 1043–1045.
- (3) A. Matsumoto, T. Ide, Y. Kaimori, S. Fujiwara and K. Soai, *Chem. Lett.*, 2015, **44**, 688–690.
